# Supplementary material for: Polypropylene–MWCNT composite degradation, and release, detection and toxicity of MWCNTs during accelerated environmental aging
Source: Royal Society of Chemistry journal article supplement (doi:10.1039/c9en00153k), 2019-01-01
Supplement: c9en00153k1.pdf [file c9en00153k1.pdf]

## Electronic Supplemental Information

### **Polypropylene-MWCNT Composite degradation, release, detection and toxicity of MWCNT during accelerated aging**

*Changseok Han<sup>1,2</sup>, E. Sahle-Demessie<sup>2,\*</sup>, Eunice Varughese<sup>2</sup>, Honglan Shi<sup>3</sup>*

<sup>1</sup>Department of Environmental Engineering, INHA University, Incheon 22212, Korea

<sup>2</sup>Oak Ridge Institute for Science and Education, Oak Ridge TN, 37831, United State

<sup>3</sup>U.S. Environmental Protection Agency, Office of Research and Development, National Risk Management Laboratory, Cincinnati, OH 45268, United State

<sup>3</sup>Missouri University of Science and Technology, Department of Chemistry, Rolla, MO, United State

\* To whom correspondence should be addressed:

E. Sahle-Demessie: Tel:+1-513-569-7739; Fax: +1-513-569-7879;  
E-mail: [sahle-demessie.endalkachew@epa.gov](mailto:sahle-demessie.endalkachew@epa.gov)

#### Contents

|     |                                                                     |   |
|-----|---------------------------------------------------------------------|---|
| 1   | Theoretical Determination of Photooxidation of Polymer plates ..... | 2 |
| S2. | Experimental .....                                                  | 4 |
| S3. | Analysis of MWCNT Released from Polymer Matrix using SP-ICP-MS..... | 8 |

## 1 Theoretical Determination of Photooxidation of Polymer plates

Photooxidation of polymer nanocomposites is a multifaceted process of chemical reaction and surface erosion. Natural weathering is of a complex process. There is little information on the mathematical modeling of directly dedicated to the aging of PP-MWCNT, it is reasonable to modify existing models to incorporate aging effects. Degradation reaction is based on the initiation, propagation, and termination of radicals, resulting in the formation of more stable structures. The reactions depend on the irradiation of UV-vis light, the presence of oxygen and the extraction of hydrogen. Photooxidation in the aging chamber is the acceleration of natural reaction that involves absorption of UV light and the presence of atmospheric oxygen generates free radicals. Thus, aging reactions such as hydrolysis, photolysis, and oxidation are superficial and includes the reaction of  $O_2$ ,  $H_2O$ , or oxidative radicals with the polymer causing disintegration. The solubility of oxygen in polypropylene at room temperature is sufficient for reactions to produce alkyl, alkoxy and peroxy radicals in the presence of UV light. The standard radical chain oxidation mechanism could be considered:

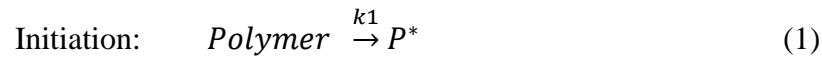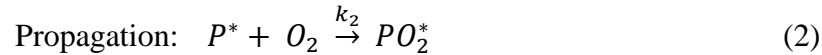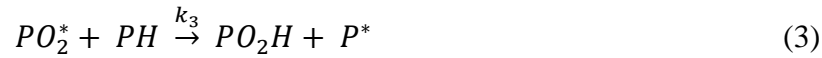

Termination:

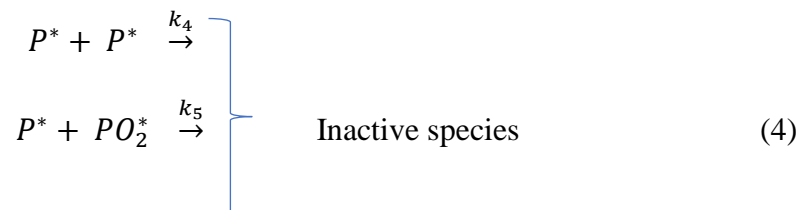

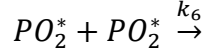

Where  $P^*$  is the polymer radical,  $k_i$  are the reaction rates. Photooxidation of polymers forms photo reactive species such as  $POOH$  where carbonyls play a significant role. The reaction of  $O_2$  with  $P^*$  is fast. Thus, we can imagine fast kinetic regime where  $O_2$  is sufficiently high, near the aging surface, and a lower kinetic regime where  $O_2$  is lower than critical. The ketones that are formed by photo-oxidation can undergo Norrish 1 and Norrish II degradation [34]. Audouine et al., have shown that for high oxygen concentration [35],

$$-\frac{d[O_2]}{dt} \cong k_2 \left( r_i / k_6 \right)^{\frac{1}{2}} [PH] \quad (5)$$

For low oxygen concentrations

$$-\frac{d[O_2]}{dt} \cong k_2 \left( r_i / k_4 \right)^{\frac{1}{2}} [O_2] \quad (6)$$

For the UV aging the reaction rate  $r_i = al^{2\gamma}$  where  $a$  and  $\gamma$  are constants depending on the mechanism, and  $\gamma$  is usually between 0.5 and 1.0 for the chain mechanism. This reaction has diffusion-controlled kinetics, where the reaction rate is a function of the local concentration of the reactants. Hence, combining Fick's second law for small reactive molecules are consumed at a rate  $r$  with polymer molecules:

$$\frac{\partial C}{\partial t} = D \frac{\partial^2}{\partial x^2} - r \quad (7)$$

Where  $D$  is the coefficient of  $O_2$  diffusion in the polymer. The reaction is a function of the local reactants concentration reaching a stationary state  $r_i \rightarrow r(C)$  and when  $\partial C / \partial t = 0$ .

The reaction can be approximated as [36]:

$$r \sim r_o = k_2 C \sqrt{\frac{r_i}{k_4}} = KC \text{ with } K = k_2 \sqrt{\frac{r_i}{k_4}} \quad (8)$$

The initiation reaction depends on the light intensity  $\Phi_i$  and light absorption.

$$r_i = \Phi_i I \quad (9)$$

Combining equations (9) and (7) and simplifying

$$D \frac{\partial^2 C}{\partial x^2} = K_o C \exp\left(\frac{x}{2X_i}\right) \quad (10)$$

The thickness of the oxidized layer (TOL) is a function of the light intensity  $\Phi_i$  and oxygen diffusion:

$$TOL \cong \Phi^{-1} = \left(\frac{D}{k}\right)^{1/2} \quad (11)$$

Thus, oxygen penetration is the controlling factor for the penetration of degradation within the sample thickness.

## S2. Experimental

### Melting and mixing of PP and MWCNTs

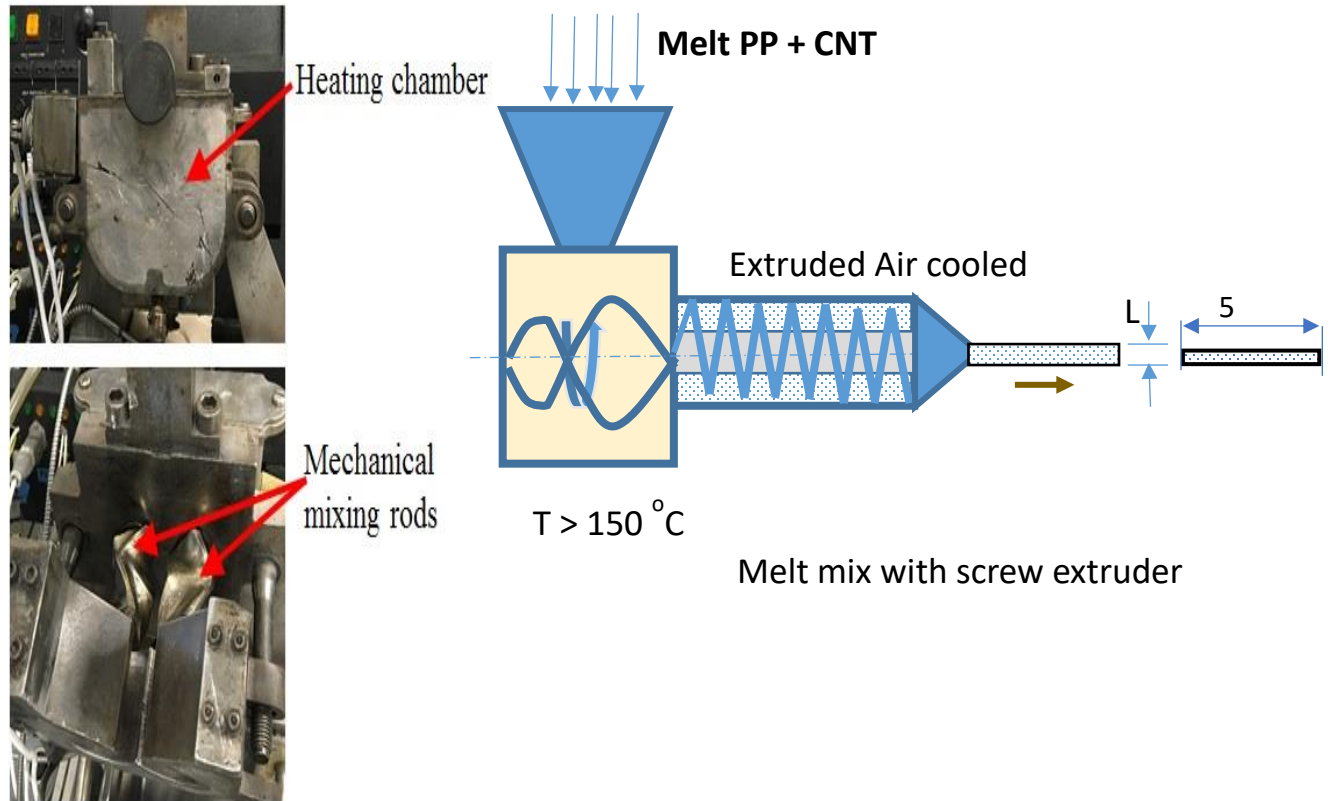

Figure S1 Experimental system used for preparing Polypropylene (PP) and PP-MWCNT rolls of selected thicknesses that were cut to make test plates

| Material                              | Cross sectional Image                                                                                                                                                      | Sizes                                                                                                                                                         |
|---------------------------------------|----------------------------------------------------------------------------------------------------------------------------------------------------------------------------|---------------------------------------------------------------------------------------------------------------------------------------------------------------|
| Polypropylene                         | 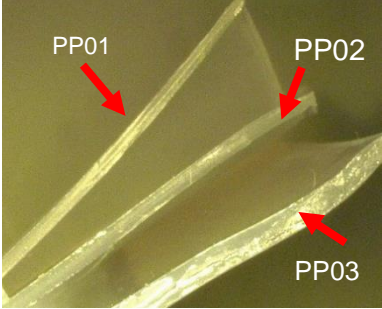                                                                                          | <p>PP01 = <math>0.25 \pm 0.01</math> mm</p> <p>PP02 = <math>0.39 \pm 0.02</math> mm</p> <p>PP03 = <math>0.69 \pm 0.04</math> mm</p>                           |
| Polypropylene-MWCNT composite (4 wt%) | <br> | <p>PP41 = <math>0.35 \pm 0.03</math> mm</p> <p>PP42 = <math>0.50 \pm 0.01</math> mm</p> <p>PP43 = <math>2.07 \pm 0.06</math> mm</p> <p>PP-MWCNT</p> <p>PP</p> |

Figure S2 Cross-sectional images test materials PP, PP-MWCNT

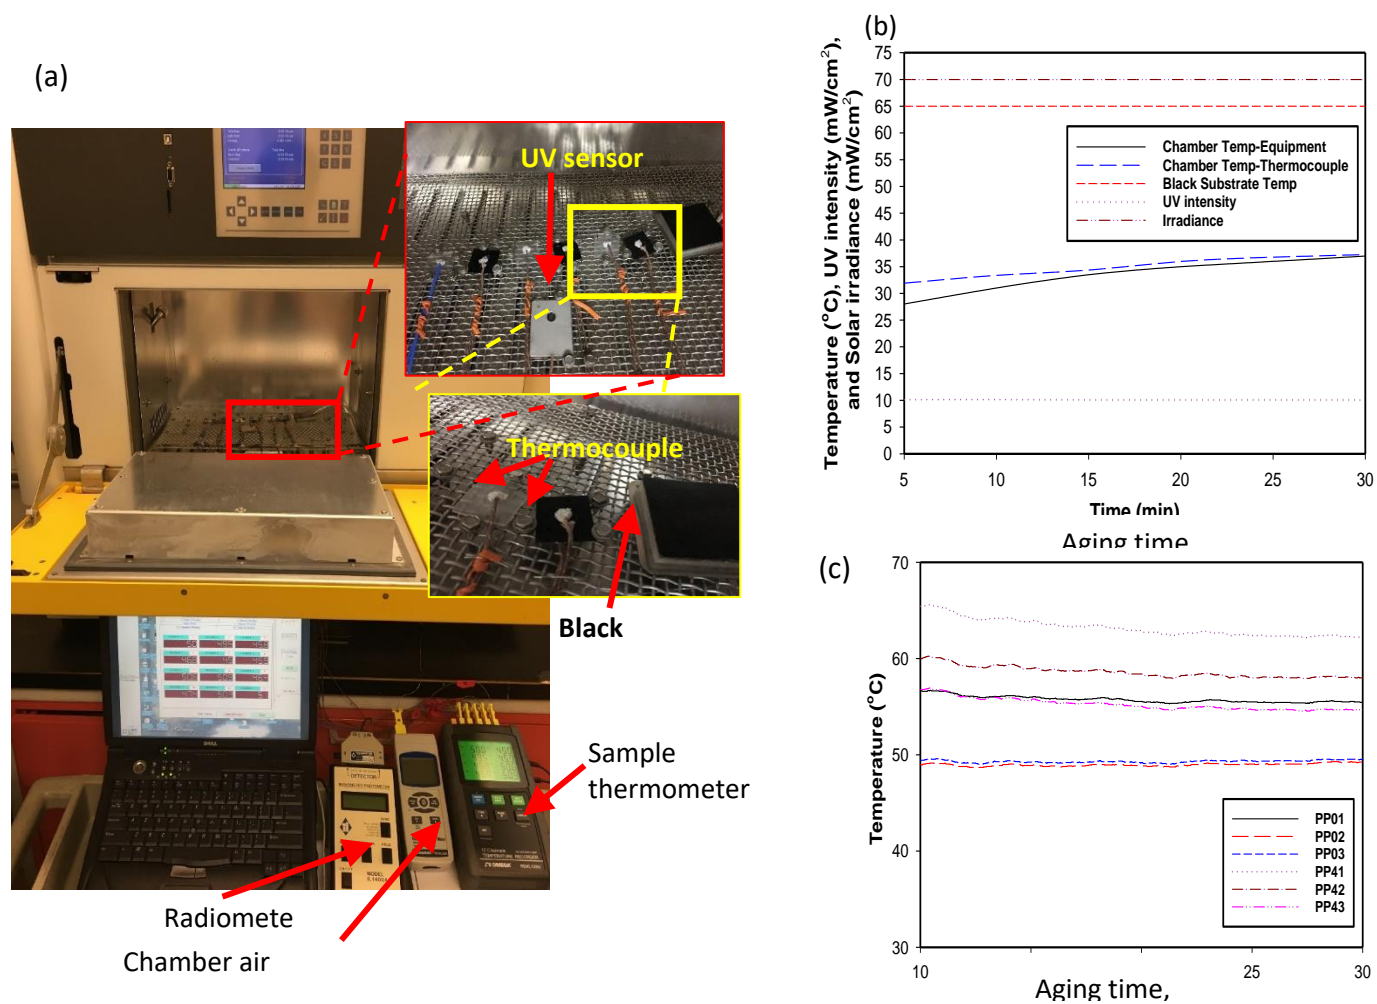

Figure S3 Accelerated weathering chamber and temperature profile of PP-CNT plate during Weathering (a) solar aging chamber, (b) Chamber Conditions during Weathering, (c) Sample Temperatures during Weathering

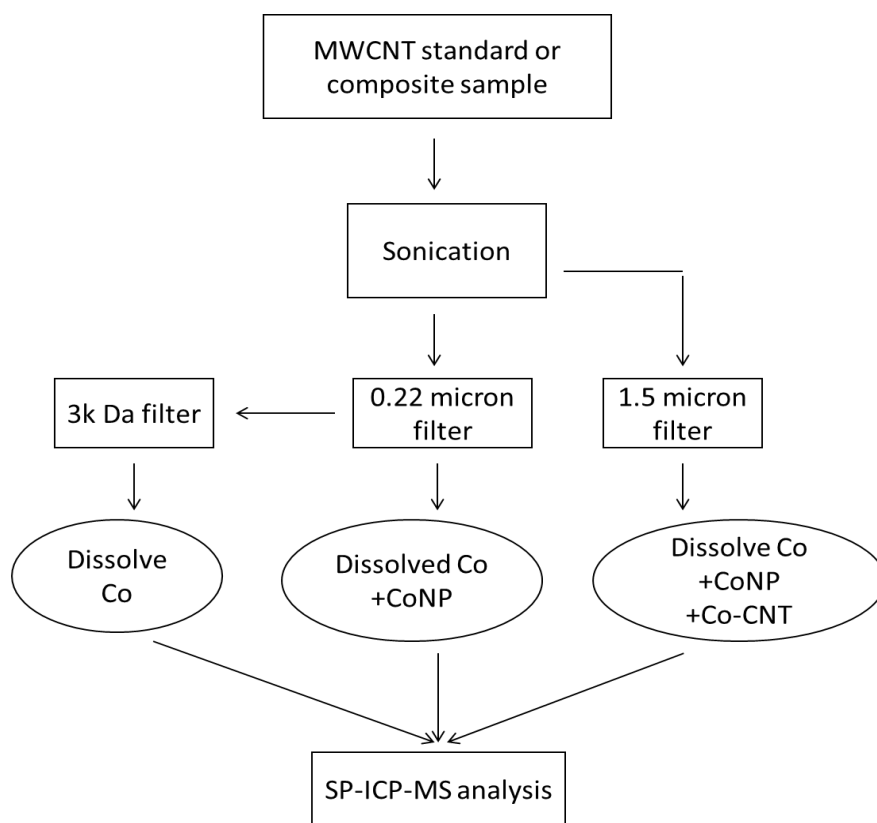

Figure S4 MWCNT standard and composite sample preparation and analysis procedure flow chart

### S3. Analysis of MWCNT Released from Polymer Matrix using SP-ICP-MS

The use single particle (SP)-ICP-MS has shown to be a highly sensitive emerging technology for the analysis of metallic nanoparticle analysis in different matrices. Unfortunately, the common nanomaterials, carbon nanotubes (CNTs), filled to polymers to improve polymer's properties, cannot be detected by SP-ICP-MS directly. However, CNTs can be detected by monitoring metal nanoparticles that used as catalysts for their preparation. In this study, we developed SP-ICP-MS method to detect MWCNT leaching from polymers by tracking cobalt nanoparticle (CoNP) that used for producing MWCNT. The commercial multi-walled CNT (MWCNT 7000) has an average 1.5  $\mu\text{m}$  length, Cobalt (NP  $\sim 10\text{ nm}$ , '60% passed through 0.22  $\mu\text{m}$  filter that were not attached to MWCNT, and Co ion. There was no Co detected that passed through 3000 Da molecule cutoff membrane.

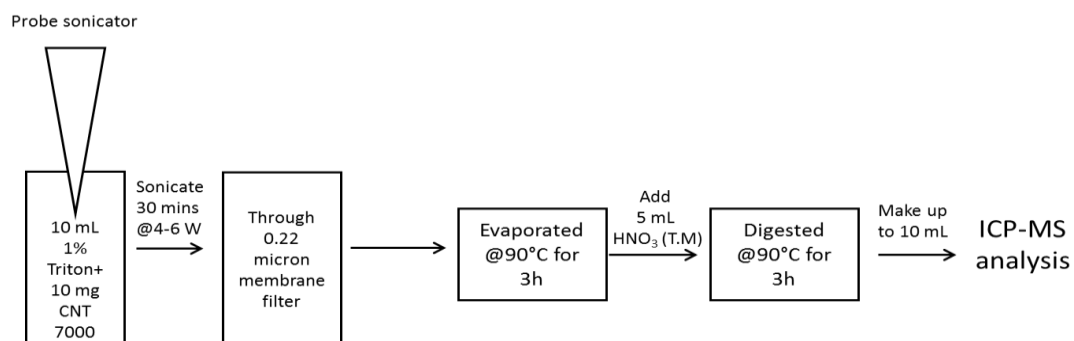

Figure S5 Flow chart for detection of Cobalt nanoparticle embedded/dissociated from MWCNTs

The instrument used was ICP-MS (PerkinElmer NexION 350 ICP-MS) with platinum cone, with SeaSpray nebulizer, and 1600 W plasma power. The gas flow in the Nebulizer was 1.00-1.02 L/min, transport efficiency  $9.00 \pm 1.00\%$  and sample flow rate  $0.320 \pm 0.020\text{ mL/min}$  and analyte used was cobalt (59). The dwell time in the analysis was 100  $\mu\text{s}$  and scan time 100s.



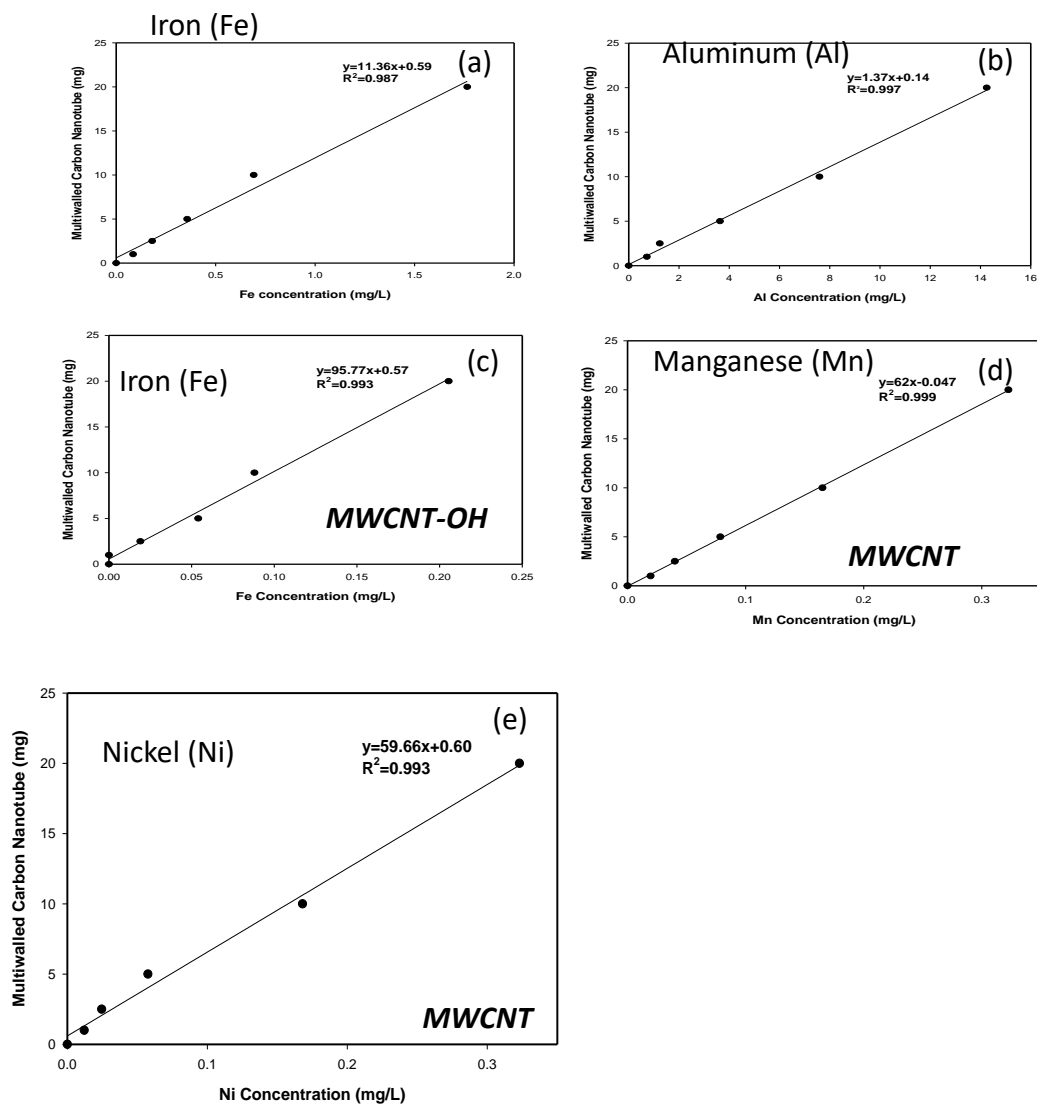

Figure S6 Calibration curve to quantify multiwalled carbon nanotube (MWCNT) (nanocyl 7000) using metal elements in MWCNT

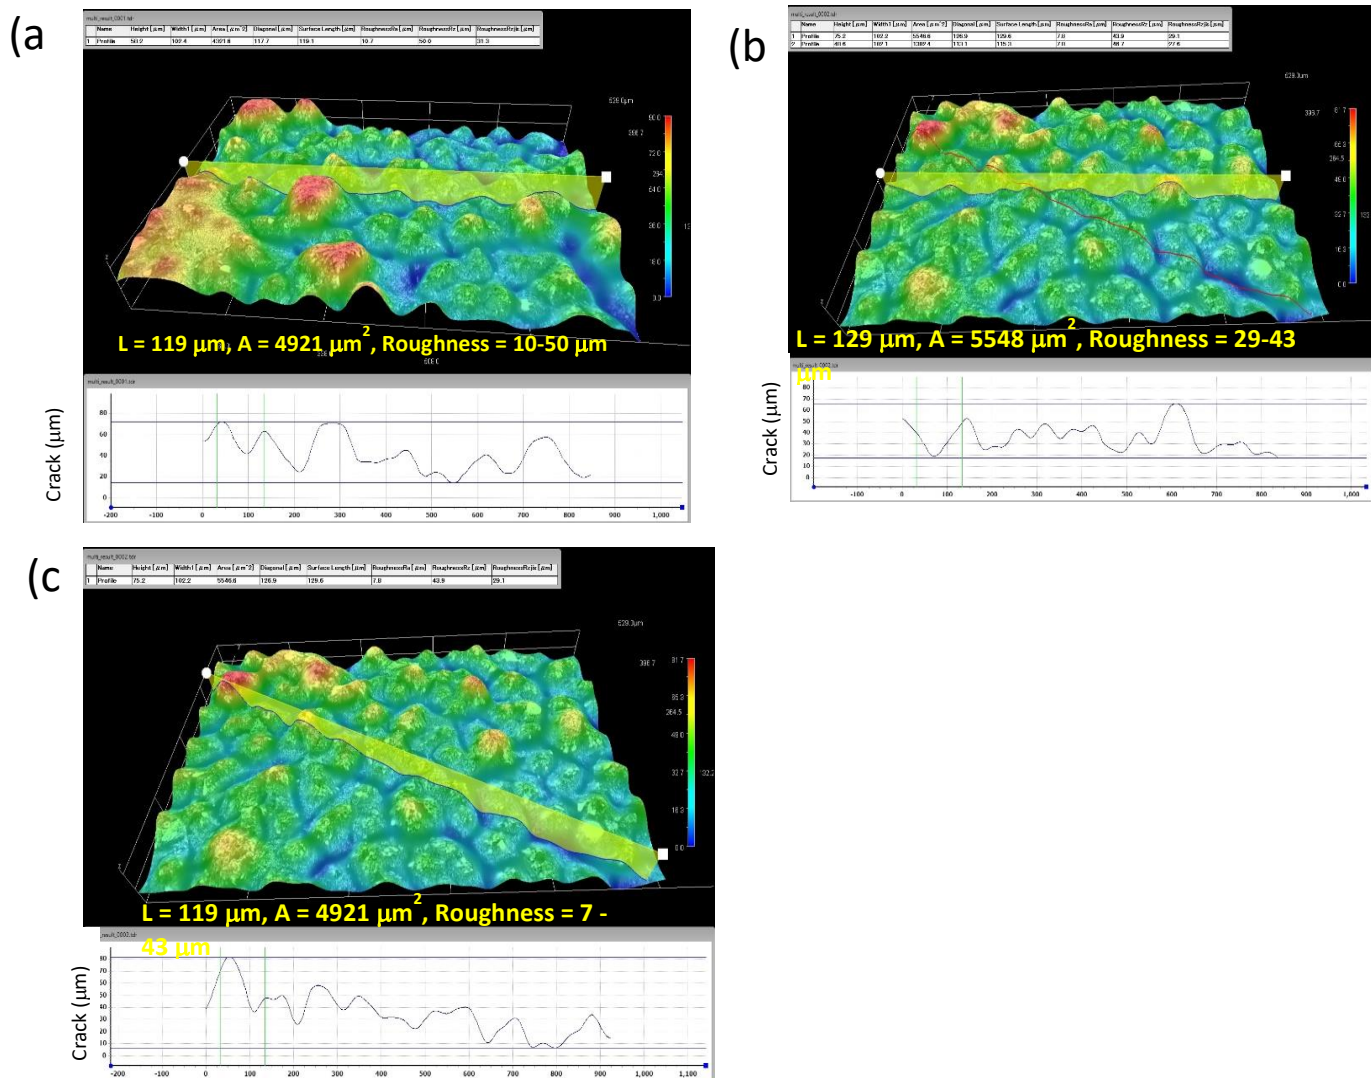

Figure S7 Digital optical image for surface characterization by Hirox 3D digital microscope which help visualize surface of aged polypropylene-MWCNT after 2268 h (a) PP41, (b) PP42, and (c) PP43

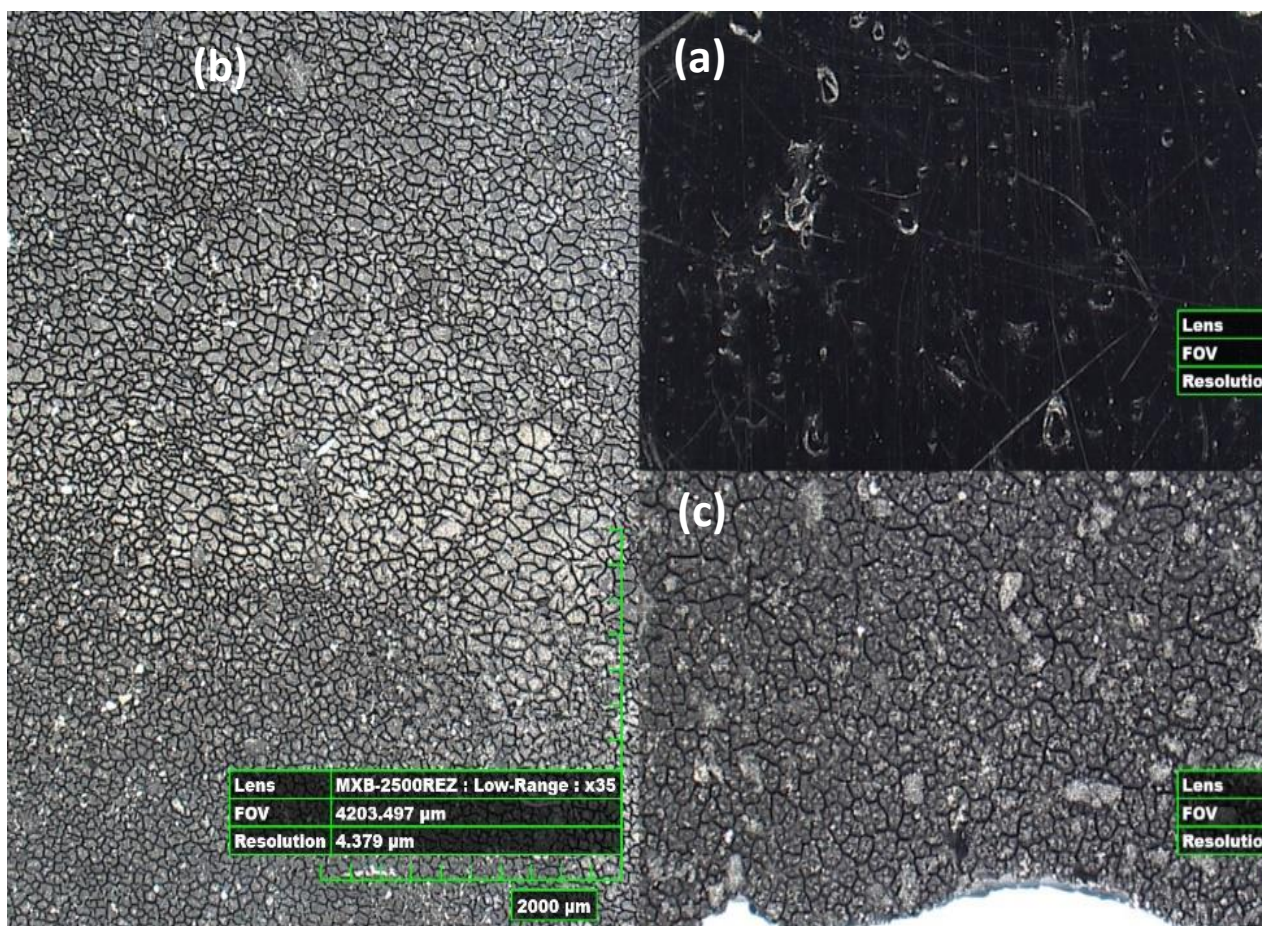

Figure S8 High resolution optical images (2000 X) of polypropylene-MWCNT showing local microstructural inhomogeneity (a) pristine PP41, (b) Environmental stress cracking after 2268 h showing craze formation and crack development, (c ) after 3024 h

Table S1 Change in surface hardness of Polypropylene-CNT with environmental aging

|     | Aged<br>Sampletime<br>(h) | Hardness<br>(a.u.) | Note                                 | Sample     | Aged<br>time (h) | Hardness<br>(a.u.) | Note                                |
|-----|---------------------------|--------------------|--------------------------------------|------------|------------------|--------------------|-------------------------------------|
| P43 | 0                         | 43.3               |                                      | <b>P03</b> | 0                | 22.7               |                                     |
|     | 756                       | 26.5               |                                      |            | 756              | -14.3              |                                     |
|     | 1512                      | 19.2               |                                      |            | 1512             | N.A.               | Sample brittle broken<br>at contact |
|     | 2268                      | -3.6               |                                      |            | 2268             | N.A.               | Sample brittle broken<br>at contact |
| P42 | 0                         | 36                 |                                      | <b>P02</b> | 0                | -24.4              |                                     |
|     | 756                       | 32.9               |                                      |            | 756              | -245               | Sample brittle broken<br>at contact |
|     | 1512                      | -96.6              | sample was<br>slightly broken        |            | 1512             | N.A.               | Sample brittle broken<br>at contact |
|     | 2268                      | -223               | sample was broken<br>during analysis |            | 2268             | N.A.               | Sample brittle broken<br>at contact |
| P41 | 0                         | 41.5               |                                      | <b>P01</b> | 0                | -34.8              |                                     |
|     | 756                       | 28.6               |                                      |            | 756              | N.A.               | sample was broken at<br>contact     |
|     | 1512                      | -151               | sample was broken<br>during analysis |            | 1512             | N.A.               | sample was broken at<br>contact     |
|     | 2268                      | N.A                | sample was broken<br>at contact      |            | 2268             | N.A.               | sample was broken at<br>contact     |

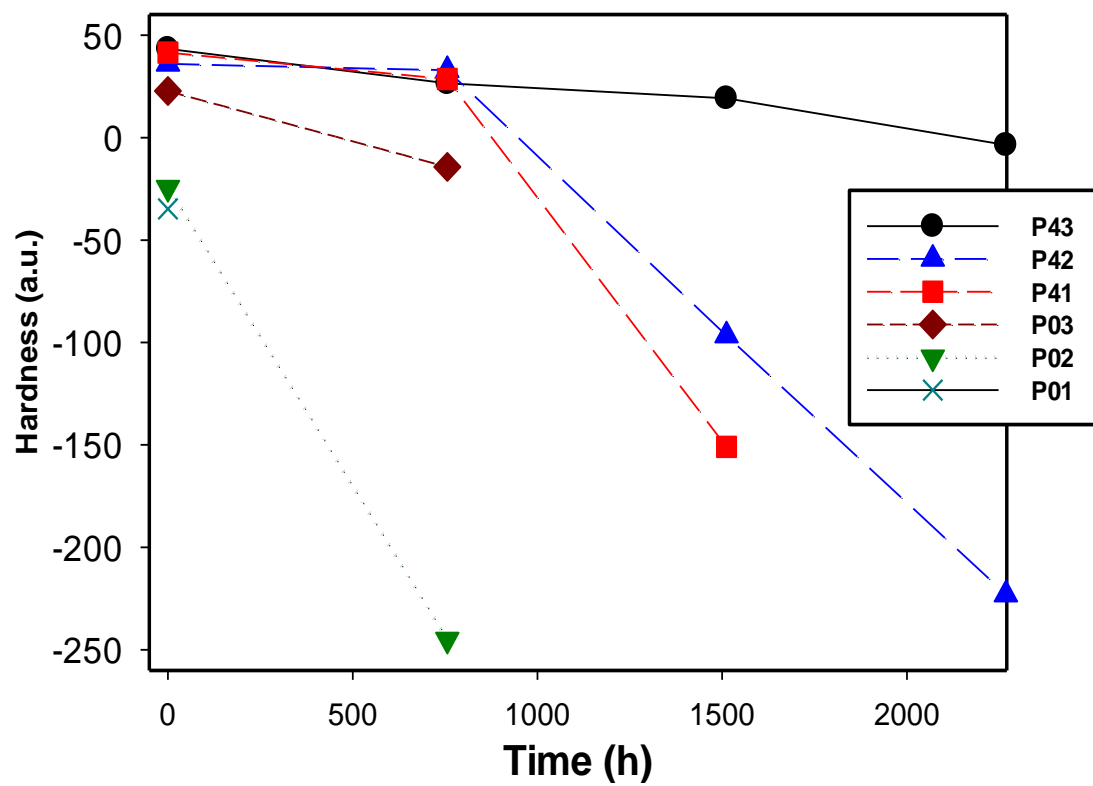

Figure S9 Change in hardness of Polypropylene-CNT as a function of environmental aging time

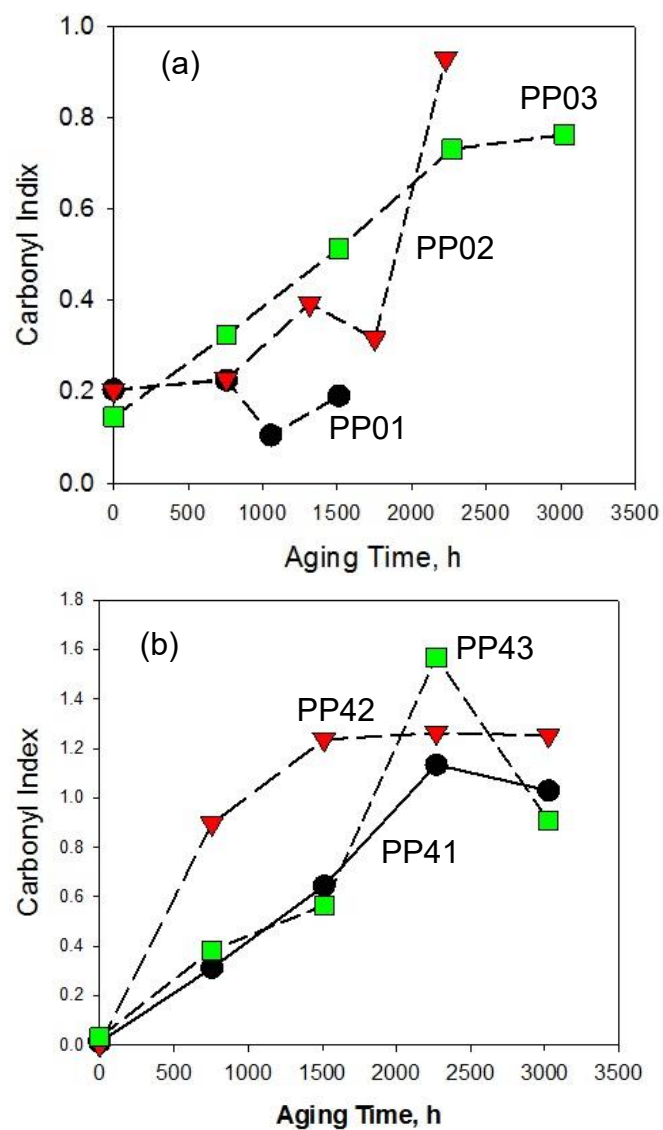

Figure S10 Carbonyl Index based on IR absorbance ratio of carbonyl groups (-OC-) at 1775 nm and methylene groups (-CH<sub>2</sub>-) at 2879 nm for surface analysis (a) PP (b) PP-MWCNT



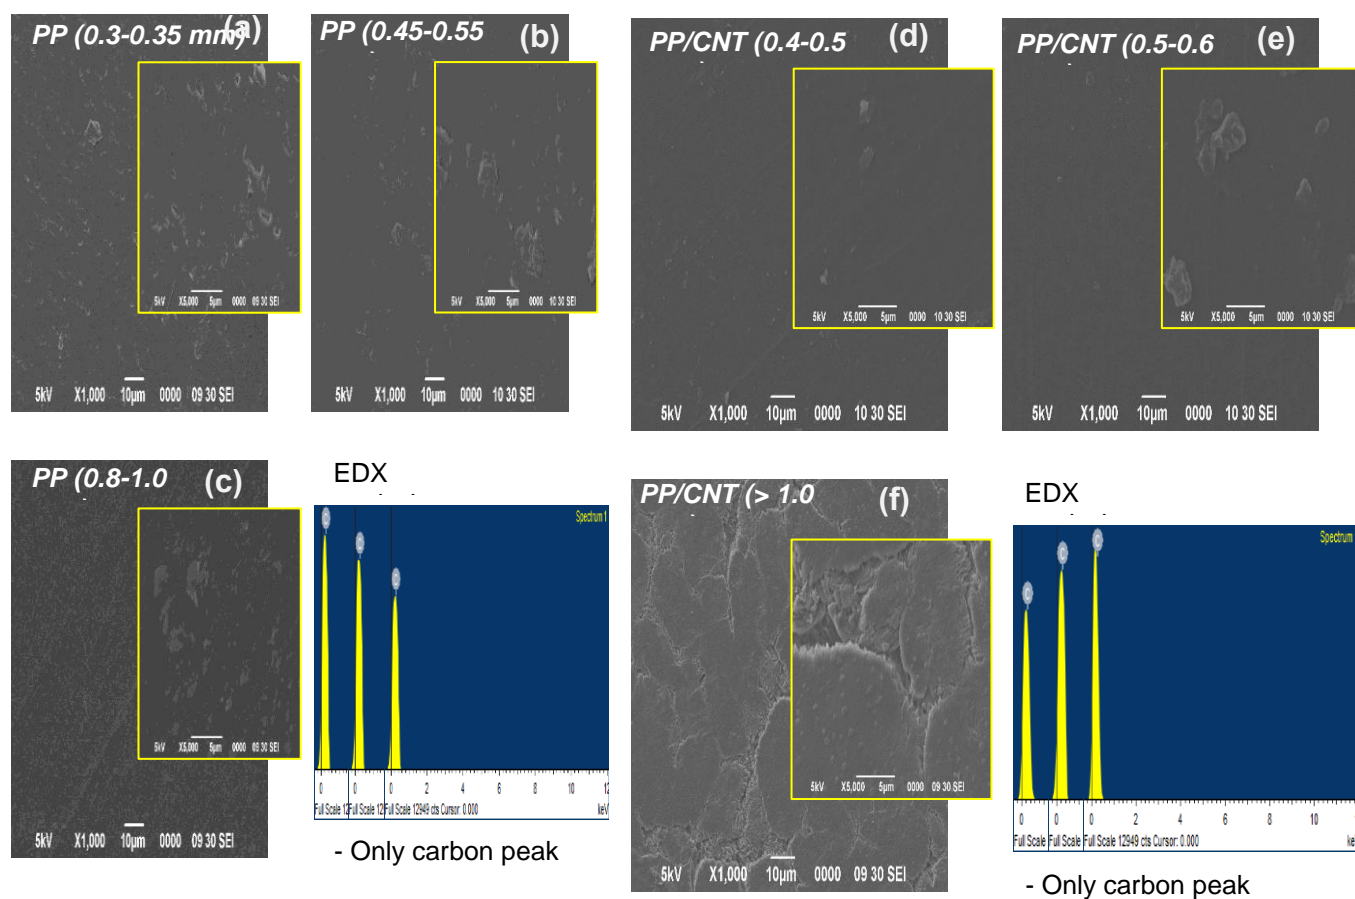

Figure S11 Scanning electron microscope images with energy dispersive X-ray spectroscopy showing surface topography and structure of polypropylene (a) PP01, (b) PP02, (c ) PP03, and polypropylene-MWCNT composites (d) PP41, (e ) PP42, and (f) PP43

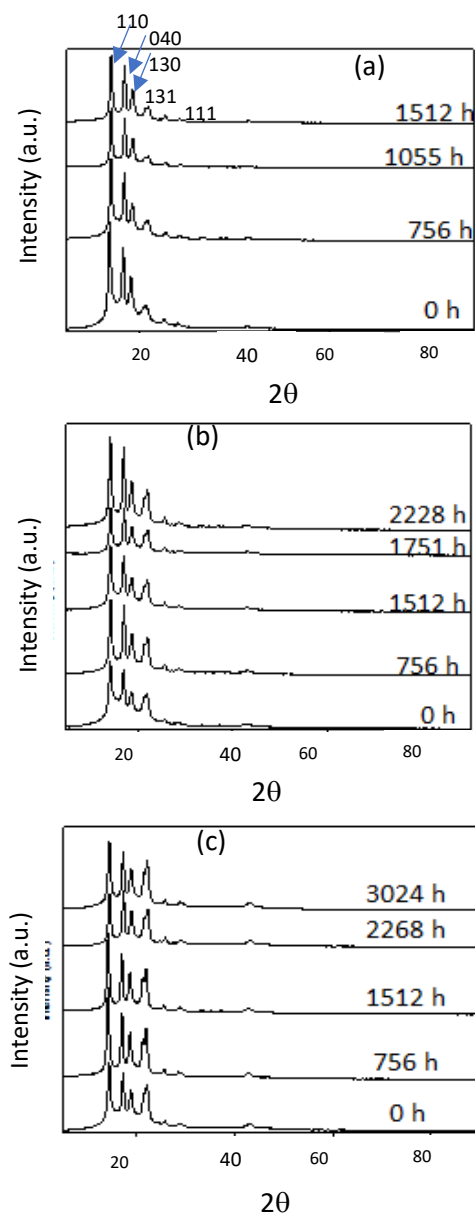

Figure S12 Structural analysis of polypropylene using X-ray powder diffraction technique as a function of the number of cycles and aging time for (a) PPO1, (b) PPO2, and (c ) PP03



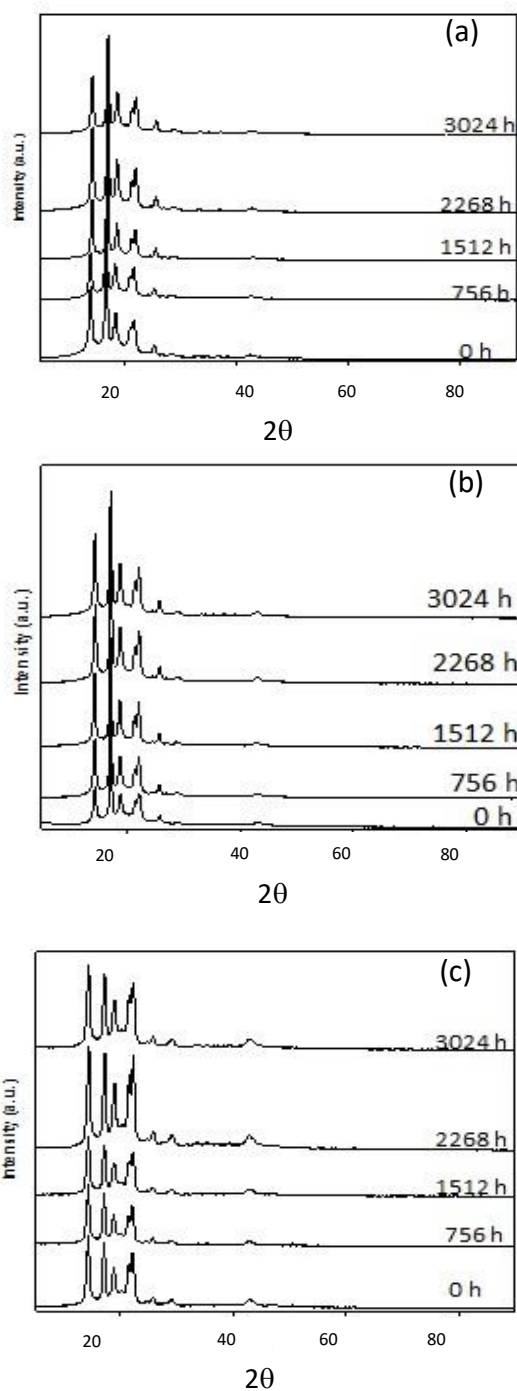

Figure S13 Structural analysis of polypropylene using X-ray powder diffraction technique as a function of the number of cycles and aging time for (a) PP41, (b) PP42, and (c) PP43

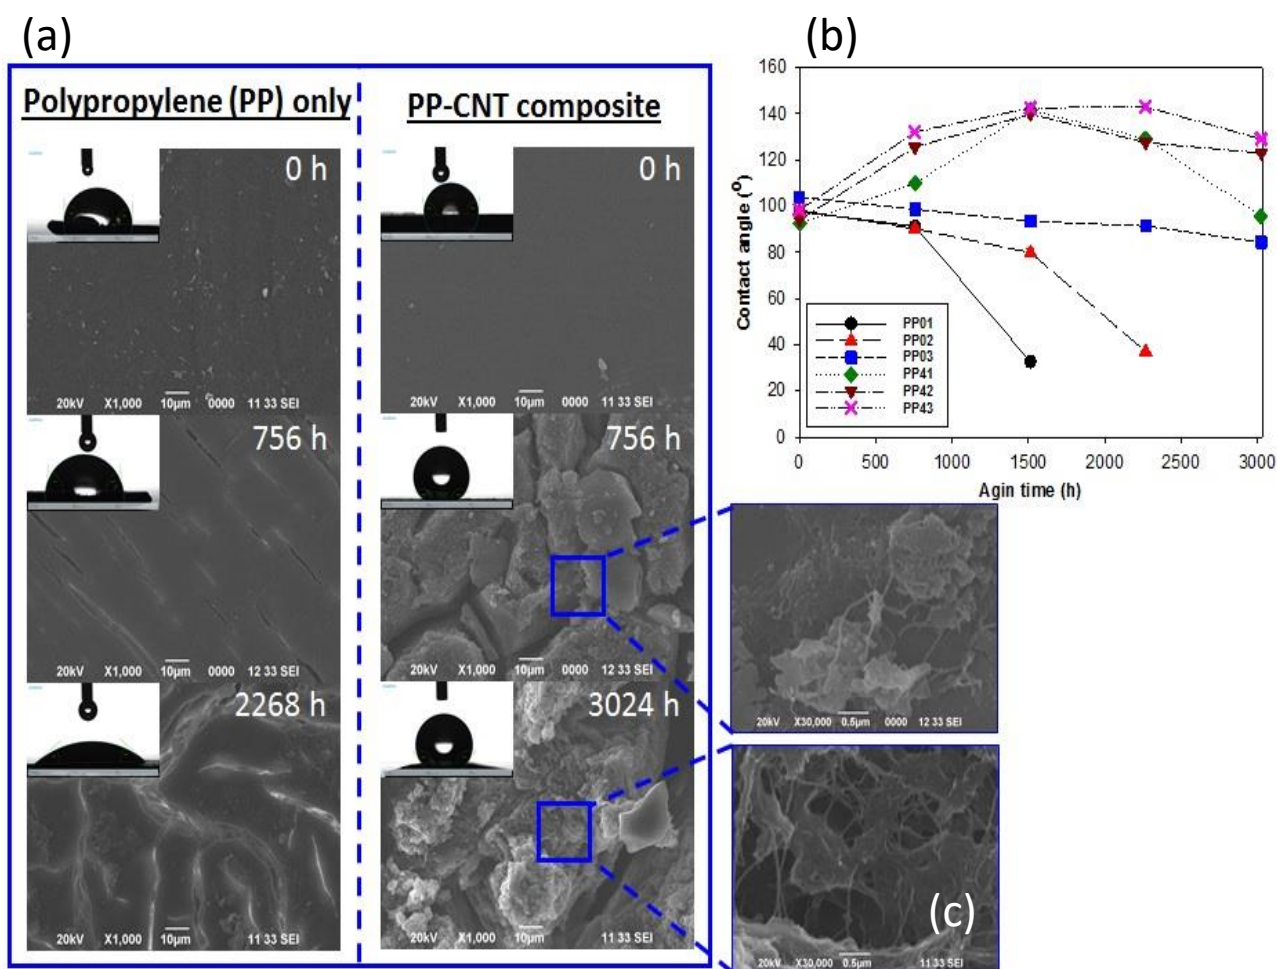

Figure S14 (a) Changes in contact angle changes during aging of PP and PP-MWCNT surfaces after selected degradation times, showing surface oxidation and erosion, (b) summary of contact angle for all samples as a function of aged times for all the samples

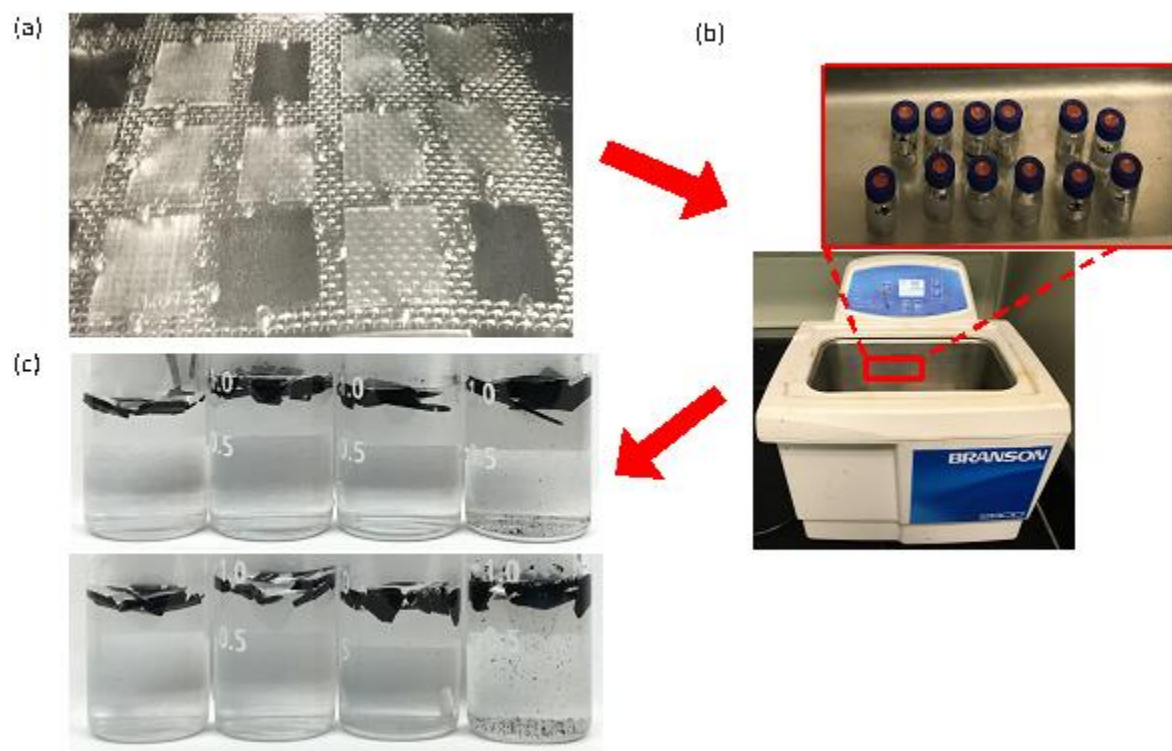

Figure S15 (a) Polypropylene (PP) and PP-carbon nanotube samples arranged for aging in the Atlas **SUNTEST** XXL<sup>+</sup> weathering chamber.(b) sonication bath used for nanorelease studies, Each sample of 20 mg was added in 1.0 mL DI water and then sonicated for 30 min. (c) samples of aged polymer composites floating in wash water and released fragments of plastics and microplastics

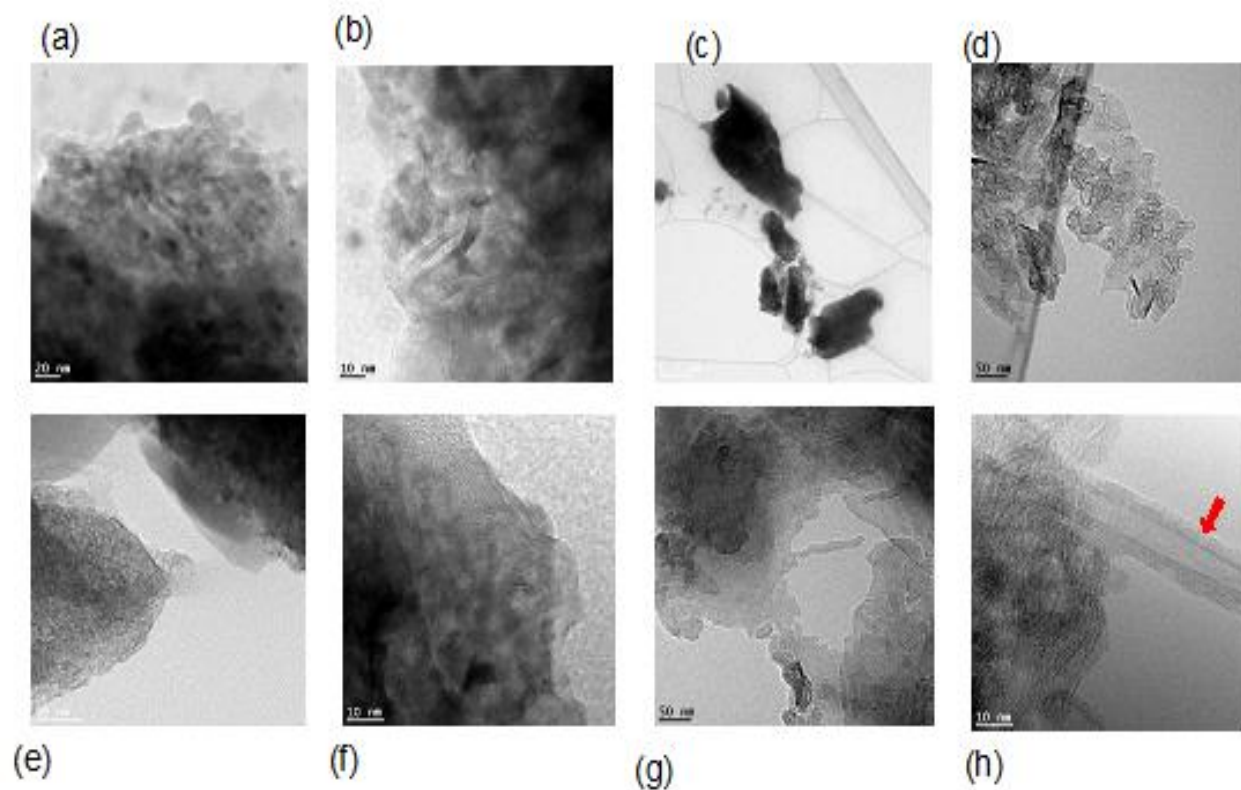

Figure S16 Transmission electron microscopy images of released polymer fragments and carbon nanotubes from aged PP-MWCNT composites
